# Supplementary material
Source: MDPI journal article supplement (https://www.mdpi.com/2306-5729/7/11/164)
Supplement: s1 [file s1]

Archive with 2 entries (2 files):
- CoviRx-supplementary-information.pdf
- Total list of 214 drugs-table.pdf
