# Supplementary material
Source: MDPI journal article supplement (https://www.mdpi.com/2306-5729/7/11/164)
Supplement: s1 [file s1 › CoviRx-supplementary-information.pdf]

# Supplementary Information

## CoviRx: A User-Friendly Interface for Systematic Down-Selection of Repurposed Drug Candidates for COVID-19

Hardik A. Jain <sup>1</sup>, Vinti Agarwal <sup>2,\*</sup>, Chaarvi Bansal <sup>2,3</sup>, Anupama Kumar <sup>4</sup>, Faheem <sup>5,6</sup>, Muzaffar-Ur-Rehman Mohammed <sup>5</sup>, Sankaranarayanan Murugesan <sup>5</sup>, Moana M. Simpson <sup>7</sup>, Avinash V. Karpe <sup>8,9</sup>, Rohitash Chandra <sup>3</sup>, Christopher A. MacRaid <sup>10</sup>, Ian K. Styles <sup>10</sup>, Amanda L. Peterson <sup>10,11</sup>, Matthew A. Cooper <sup>12</sup>, Carl M. J. Kirkpatrick <sup>13</sup>, Rohan M. Shah <sup>8</sup>, Enzo A. Palombo <sup>8</sup>, Natalie L. Trevaskis <sup>10</sup>, Darren J. Creek <sup>10</sup> and Seshadri S. Vasan <sup>14,15,16,\*</sup>

- <sup>1</sup> Birla Institute of Technology and Science, Department of Electrical and Electronics Engineering, Pilani, Rajasthan, India
  - <sup>2</sup> Birla Institute of Technology and Science, Department of Computer Science and Information Systems, Pilani, Rajasthan, India
  - <sup>3</sup> University of New South Wales, School of Mathematics and Statistics, NSW, Australia
  - <sup>4</sup> Commonwealth Scientific and Industrial Research Organisation, Land and Water, Waite Campus, SA, Australia
  - <sup>5</sup> Birla Institute of Technology and Science, Department of Pharmacy, Pilani, Rajasthan, India
  - <sup>6</sup> University of Utah, Department of Medicinal Chemistry, Salt Lake City, UT, USA
  - <sup>7</sup> Compounds Australia, Griffith Institute for Drug Discovery, Griffith University, Nathan, QLD, Australia
  - <sup>8</sup> Swinburne University of Technology, Department of Chemistry and Biotechnology, Hawthorn, VIC, Australia
  - <sup>9</sup> Commonwealth Scientific and Industrial Research Organisation, Land and Water, Dutton Park, QLD, Australia
  - <sup>10</sup> Monash University, Drug Delivery, Disposition and Dynamics, Monash Institute of Pharmaceutical Sciences, Parkville, VIC, Australia
  - <sup>11</sup> Bio21 Institute, University of Melbourne, Parkville, VIC, Australia;
  - <sup>12</sup> The University of Queensland, Institute for Molecular Bioscience, Brisbane, QLD, Australia
  - <sup>13</sup> Monash University, Centre for Medicine Use and Safety, Monash Institute of Pharmaceutical Sciences, Parkville, Victoria 3052, Australia
  - <sup>14</sup> Commonwealth Scientific and Industrial Research Organisation, Australian Centre for Disease Preparedness, Geelong, VIC, Australia
  - <sup>15</sup> Department of Health, 189 Royal Street, East Perth, WA 6004, Australia
  - <sup>16</sup> University of York, Department of Health Sciences, York, YO10 5DD, UK
- \* Correspondence: Dr Vinti Agarwal [vinti.agarwal@pilani.bits-pilani.ac.in](mailto:vinti.agarwal@pilani.bits-pilani.ac.in) or Professor Seshadri S. Vasan [prof.vasan@york.ac.uk](mailto:prof.vasan@york.ac.uk)

# Table of Contents

|                                                                                      |           |
|--------------------------------------------------------------------------------------|-----------|
| <b>S1. Table listing Python libraries used for the development of CoviRx.....</b>    | <b>3</b>  |
| <b>S2. List of external APIs used by CoviRx.....</b>                                 | <b>4</b>  |
| <b>S3. User Interface .....</b>                                                      | <b>5</b>  |
| S3.1 Drug upload form.....                                                           | 5         |
| S3.2 Contact form .....                                                              | 6         |
| S3.3 Identifiers available for normal search mode.....                               | 6         |
| S3.4: Graphical visualization giving database overview .....                         | 7         |
| <b>S4. Admin panel .....</b>                                                         | <b>8</b>  |
| S4.1 Website Analytics .....                                                         | 8         |
| S4.2 Drug bulk upload feature, invalidated drugs are shared via email as depicted in |           |
| S4.3 .....                                                                           | 9         |
| S4.3 Email sent by CoviRx to correct invalidated drugs .....                         | 10        |
| S4.4 Invitation email.....                                                           | 10        |
| S4.5 Tech stack used for development.....                                            | 11        |
| <b>S5 Formulas .....</b>                                                             | <b>12</b> |
| <b>S6.Website general information .....</b>                                          | <b>12</b> |
| <b>S7. Code Repository .....</b>                                                     | <b>12</b> |
| <b>S8. Code Usage .....</b>                                                          | <b>12</b> |
| <b>S9. API calls available .....</b>                                                 | <b>13</b> |
| S9.1. Drugs Metadata API.....                                                        | 13        |
| S9.2 Similar Drugs API.....                                                          | 14        |
| S9.3 Charts API .....                                                                | 15        |
| S9.4 Download drug data API .....                                                    | 16        |
| <b>S10. Additional information regarding reusability of CoviRx web app .....</b>     | <b>22</b> |
| <b>S11. References .....</b>                                                         | <b>22</b> |

### S1. Table listing Python libraries used for the development of CoviRx

| No. | Library name            | Version    | Used for                                                        | References |
|-----|-------------------------|------------|-----------------------------------------------------------------|------------|
| 1   | django                  | 3.2.6      | Webframework                                                    | [1]        |
| 2   | google_auth             | 2.3.0      | Authentication services                                         | [2]        |
| 3   | rdkit-pypi              | 2021.9.2.1 | Determining drug similarity                                     | [3]        |
| 4   | django-flat-json-widget | 0.1.3      | Styling Custom Fields                                           | [4]        |
| 5   | django-admin-interface  | 0.16.3     | Styling django admin                                            | [5]        |
| 6   | premailer               | 3.10.0     | Styling the mailing templates                                   | [6]        |
| 7   | celery                  |            | To be used in the future to ensure data persistency on failures | [7]        |

## S2. List of external APIs used by CoviRx

| No. | External service | Used for                              | References |
|-----|------------------|---------------------------------------|------------|
| 1   | Google Charts    | Creating graphical visualisations     | [8]        |
| 2   | Google Translate | Translating web page                  | [9]        |
| 3   | Google reCAPTCHA | Preventing bots from submitting forms | [10]       |
| 4   | Google OAuth     | Authentication services               | [2]        |
| 5   | Google SMTP      | Mailing services                      | [11]       |

## S3. User Interface

### S3.1 Drug upload form

The screenshot displays the CoviRx website interface. At the top, a purple navigation bar contains links: Home, Purpose, Organisations, Contact, References, and Contribute Drugs. The 'Contribute Drugs' dropdown menu is open, showing options: Add Drug, View Drugs, and Download. A green box highlights the 'Add Drug' option, with a callout stating: 'Add a drug/view drugs contributed by you/download drugs contributed by you'. Below the navigation bar, the CoviRx logo and the text 'Covid19 Drug Repurposing Database' are visible. The main content area features a 'Drug Form' with the following fields:

- Name\***: Name of Person Working on Drug (Please enter your full name.)
- Email\***: Please enter your valid email address (We will never share your email with anyone else.)
- Organisation\***: Organization where the work was carried out (Please share your organisation name.)
- Drug Name\***: Tolterodine (tartrate) (Please share your organisation name.)
- Invitro**: Procedure
- Invivo**: Procedure
- Exvivo**: Procedure
- Activity Results\***: Test(C5q/EC50) Values (Please share the results)
- Inference**: With reference to Covid (Please add the inference)

A yellow box labeled 'One form per drug' points to the form. A red box labeled 'reCAPTCHA - to prevent bots and Checkbox - to receive a copy of responses' points to the reCAPTCHA checkbox and the 'Send me a copy of my responses' checkbox. A bracket on the right side of the form indicates 'Various fields to be filled'. At the bottom of the form is an 'ADD DRUG' button.

### S3.2 Contact form

**CoviRx**  
Covid19 Drug Repurposing Database

Contact us for providing feedback, requesting access to contribute drugs,

reCAPTCHA - to prevent bots and Checkbox - to receive a copy of responses

### Contact Form

**Name\***  Please enter your full name.

**Email\***  We will never share your email with anyone else.

**Phone Number**  We will never share your phone number with anyone else.

**Organisation**  You can leave this blank if you do not wish to share your organisation name.

**Subject\***  Please enter the subject for contacting us and kindly keep the subject short. Use Message section for more details.

**Message**  Please type in your query, criticism, proposal, suggestion, etc.

Fields marked with \* are compulsory.

☐ I'm not a robot

☒ Send me a copy of my responses.

[Send Message](#)

Various fields to be filled

Select Language  
Powered by Google Translate

Multi language support

### S3.3 Identifiers available for normal search mode

Different identifiers that can be used in normal search mode

The screenshot shows the CoviRx website interface. On the left, a sidebar lists search identifiers: name (selected), smiles, inchi, synonyms, cas\_number, chebi, and pubchemid. The main content area includes a search bar, a 'Change Identifier' button, and 'Chart Visualisations' such as 'Drugs in database', 'Label-wise classification of drugs in database', and 'Clinical Phase'. A 'Change identifier for normal search mode' callout points to the 'Change Identifier' button.

### S3.4: Graphical visualization giving database overview

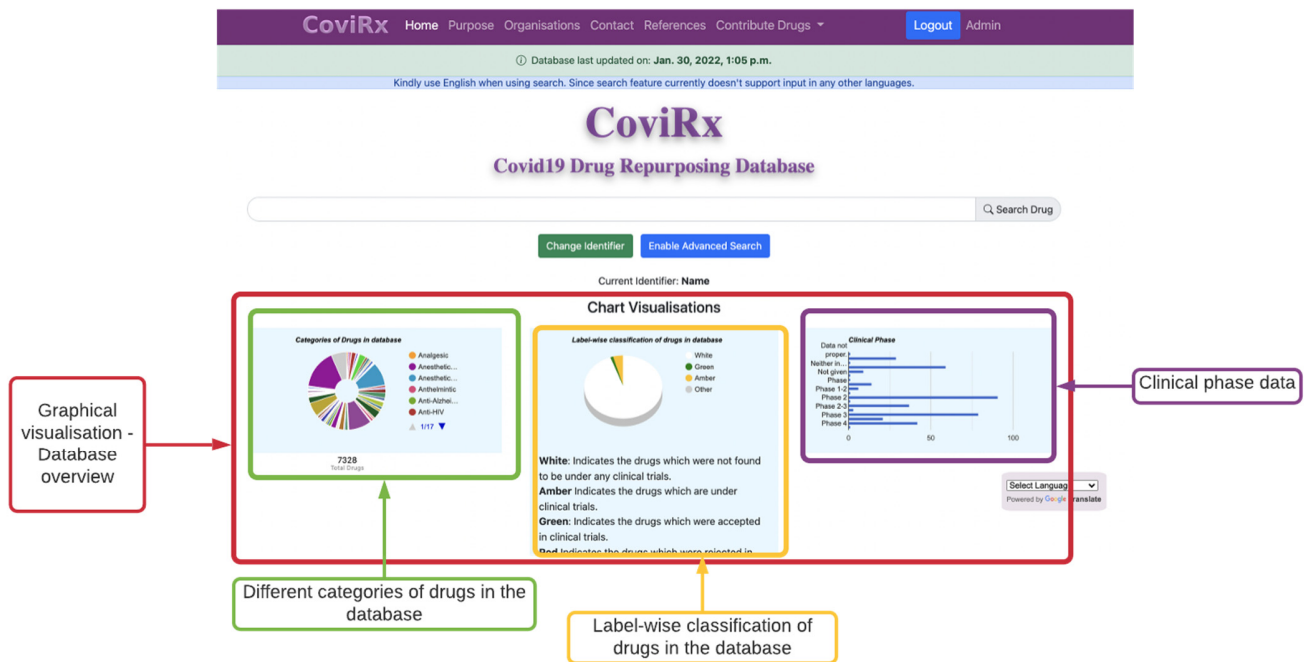

## S4. Admin panel

### S4.1 Website Analytics

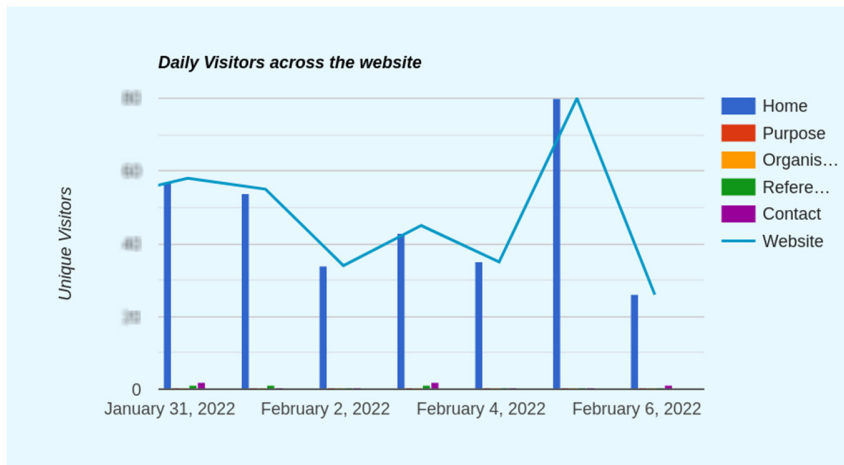

S4.2 Drug bulk upload feature, invalidated drugs are shared via email as depicted in S4.3

The screenshot displays the CoviRx Covid19 Drug Repurposing Database interface. The top navigation bar includes links for Home, Purpose, Organisations, Contact, References, and Contribute Drugs, along with Login and Admin buttons. A status message indicates the database was last updated on Jan. 23, 2022, at 3:23 p.m.

The main section is titled "CoviRx Covid19 Drug Repurposing Database". It features a "Bulk Drugs upload using a .csv file" section with a "Browse..." button and a file name "SARSCov2\_drugScreens\_v4.xlsx - SARSCov2\_drugScreens\_filtered1.csv". Below this, a "File Upload progress" bar shows "100.00% file uploaded".

A "Track your upload progress and drug validation status" section shows a progress bar for "Drugs are being added in the database after validation" with a value of "0 6...". Below this, a "Process" table displays the following data:

| Total Drugs to be processed | Drugs Successfully added | Drugs Invalidated |
|-----------------------------|--------------------------|-------------------|
| 7817                        | 506                      | 15                |

A "List of invalid drugs" section is also present, with a "Show Invalid Drugs" button. The list includes the following drugs and their validation errors:

- Phenytoin (sodium): {pubchemid: [ValidationError("Drug with this Pubchemcid already exists.")]}
- Lapatinib: {synonyms: [ValidationError("Drug with this Synonyms already exists.")]}
- Osimertinib (AZD9291): {synonyms: [ValidationError("Drug with this Synonyms already exists.")]}
- Ceritinib (LDK378): {synonyms: [ValidationError("Drug with this Synonyms already exists.")]}
- Ibrutinib (PCI-32765): {synonyms: [ValidationError("Drug with this Synonyms already exists.")]}

A "Report of invalid drugs is generated" section is also shown, with a "Show Invalid Drugs" button.

### S4.3 Email sent by CoviRx to correct invalidated drugs

List of invalid drugs in latest drug upload on CoviRx > Inbox X

to , me

May 05, 2020, 5:40 PM

## CoviRx

### Covid19 Drug Repurposing Database

During the latest drug upload on CoviRx, many drugs couldn't get added into the database. A list for the same has been shared with you.

| Drug Name                      | Reason for rejecting addition to database                                  |
|--------------------------------|----------------------------------------------------------------------------|
| CHLORPHEZOLINE                 | {'synonyms': [ValidationError([Drug with this Synonyms already exists.])]} |
| NEOTREXIDE                     | {'synonyms': [ValidationError([Drug with this Synonyms already exists.])]} |
| CHLORPHEZOLINE                 | {'inchi': [ValidationError([Drug with this Inchi already exists.])]}       |
| CHLORPHEZOLINE TO COMBINE WITH | {'inchi': [ValidationError([Drug with this Inchi already exists.])]}       |

### S4.4 Invitation email

You have been invited to join CoviRx admin > Inbox X

covirxwebapp@gmail.com

to

May 11, 2020, 10:00 PM

## CoviRx

### Covid19 Drug Repurposing Database

You have been invited to the CoviRx admin panel by H J.

To become an admin member, visit our website [Home Page](#) and click on the Google button in the header pane to login.

Please login within 7 days to accept the invite. This invite will expire in 7 days from the time of receiving this email.

## S4.5 Tech stack used for development

### Font scripts

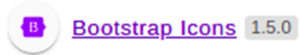

### Web frameworks

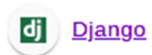

### Web servers

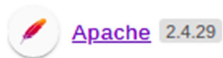

### JavaScript graphics

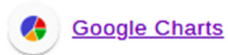

### Programming languages

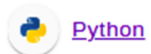

### Operating systems

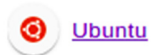

### CDN

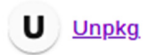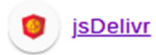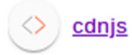

### JavaScript libraries

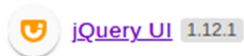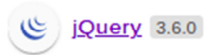

### UI frameworks

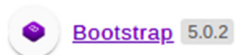

### Authentication

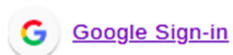

## S5 Formulas

Calculation of Tanimoto Coefficient [12, 13]

$$S_{A,B} = \frac{[\sum_{j=1}^n x_{jA} x_{jB}]}{[\sum_{j=1}^n (x_{jA})^2 + \sum_{j=1}^n (x_{jB})^2 - \sum_{j=1}^n x_{jA} x_{jB}]}$$

$x_{jA}$  means the  $j$ -th feature of molecule A.  $a$  is the number of *on* bits in molecule A,  $b$  is the number of *on* bits in molecule B.

## S6. Website general information

- For contributing drugs to CoviRx:
  - Individuals who want to contribute drugs to CoviRx can reach out to our team using the contact form, and necessary privileges and access would be made available.
  - The submitted drugs will undergo a manual review by our team to ensure reliability and uniformity of data so that they won't get merged into the database right away.
- Privacy concerns:
  - We declare that any details collected from users using the website are purely to provide core functionalities.
  - Any identifying information related to website users is not stored in our database unless the user contacted us via the contact form or a drug has been contributed and sent for verification.
  - All the cookies used by our website have been listed and well explained in our [cookie policy](#).

## S7. Code Repository

[GitHub Repository](#) [[Private currently](#)]

## S8. Code Usage

- The [technical documentation](#) detailing the various files in the code can be referred to.
- For instructions regarding setting up the web app on your local computer, please refer to the README instructions provided in the repository.

## S9. API calls available

Besides using the CoviRx web app, individuals can also get the data by using multiple API endpoints provided by the CoviRx platform.

Every drug in the CoviRx database is stored with a unique ID, referred to as <drug\_id>.

This <drug\_id> can be obtained from the URL to the drug. For example, in

<https://www.covirx.org/drug/b2d6cf7d-17e4-4f72-b073-974fd17106fc>, **b2d6cf7d-17e4-4f72-b073-974fd17106fc** is the <drug\_id>.

### S9.1. Drugs Metadata API

This API endpoint can be used to perform search operations.

- a. Parameters supported:
  - i. suggestions: the number of tips needed (a maximum of 20)
  - ii. keyword: the keyword to be searched for and the identifier
  - iii. filters: the filters that need to be satisfied separated by commas
- b. Endpoint: `api/drugs-metadata`
- c. Method: GET
- d. Response contains:
  - i. A maximum of 5 drugs
- e. Example request:

```
curl -G -d 'keyword={"name":"a"}' 'https://www.covirx.org/api/drugs-metadata?suggestions=2'
```

- f. Example response:

```
{
  "0": {
    "name": "Abiraterone acetate",
    "smiles":
"CC(=O)O[C@H]1CC[C@@]2(C)C(=CC[C@H]3[C@@H]4CC=C(c5ccnc5)[C@@]4(C)CC[C@@H]32)C1",
    "inchi": null,
    "synonyms": "CB7630",
    "cas_number": "154229-18-2",
    "chebi": null,
    "pubchemid":
"139597119|87055577|87055578|9821849|152986093|144748333|75201460|11670322|86582960|144878649|71696658",
    "indication_class": "Antineoplastic",
    "label": "1",
    "id": "5e03cd3b-efb1-5732-9e7e-f6aec090d005"
```

```

},
"1": {
  "name": "Azatadine (dimaleate)",
  "smiles":
"CN1CCC(=C2c3ccccc3CCc3ccnc32)CC1.O=C(O)/C=C\\C(=O)O.O=C(O)/C=C\\C(=O)O",
  "inchi": null,
  "synonyms": "Azatadine maleate",
  "cas_number": "3978-86-7",
  "chebi": null,
  "pubchemid":
"66273|16052003|75373670|53486409|21158508|19861|91114266|59910424|5281066|69650887|21933
722",
  "indication_class": "Antiallergic",
  "label": "1",
  "id": "3cb3b3bd-32ad-5749-90c1-4ec6fa164787"
}
}

```

## S9.2 Similar Drugs API

CoviRx provides an endpoint that can get a maximum of 5 similar drugs based on the Tanimoto coefficient by providing the <drug\_id> associated with the drug.

- g. Parameters required: None
- h. Endpoint: `api/similar/<drug_id>`
- i. Method: GET
- j. Response contains:
  - i. A JSON containing a maximum of 5 drugs
  - ii. For every drug, its id, name, and SMILES value
- k. Example request:

```
curl "https://www.covirx.org/api/similar/5982620b-1cf2-54de-945a-0f6e1319d859"
```

- l. Example response:

```

{
  "0": {
    "id": "95b145ea-f19c-5e4d-8ea8-f27dff256ec5",
    "name": "METHOXSALEN",
    "smiles": "COc1c2oc(=O)ccc2cc2ccoc12"
  },
  "1": {
    "id": "bb020607-4a1a-5e88-8fc2-fed627a1880f",
    "name": "Aminophylline",

```

```

    "smiles":
"Cn1c(=O)c2[nH]cnc2n(C)c1=O.Cn1c(=O)c2[nH]cnc2n(C)c1=O.NCCN"
  },
  "2": {
    "id": "47c3bd83-f6bb-5531-8064-56c53a300372",
    "name": "(R)-(-)-Ibuprofen",
    "smiles": "CC(C)Cc1ccc([C@@H](C)C(=O)O)cc1"
  },
  "3": {
    "id": "2882f16f-5cb6-5b94-801c-034388e21129",
    "name": "D-(+)-MALTOSE",
    "smiles":
"OC[C@H]1O[C@@H](O)[C@H](O)[C@@H](O)[C@@H]1O[C@H]1O[C@H](CO)[C@@H](O)[C@H](O)[C@H]1O"
  },
  "4": {
    "id": "e865272e-7579-5702-8ac2-6fccf37c08e8",
    "name": "Irisflorentin",
    "smiles": "C0c1cc(-c2coc3cc4c(c(OC)c3c2=O)OC04)cc(OC)c1OC"
  }
}

```

### S9.3 Charts API

All the graphical visualisations in CoviRx use the data provided by this endpoint. An overview of the dataset can be obtained from the same.

m. Parameters required:

- i. data: an array of strings containing the name of charts whose data is needed. Currently, options include 'categories,' 'label,' 'phase.'

n. Endpoint: `api/charts-json`

o. Method: GET

p. Response Contains:

- i. A JSON containing the charts that have been requested
- ii. Every chart data is presented in the form of a 2D array

q. Example request: for labels and phase data

```
curl --request GET "https://www.covirx.org/api/charts-json?charts[]=labels"
```

r. Example response:

```
{
```

```

"labels": [
  [
    "Drug Labels",
    "Number of drugs"
  ],
  [
    "White",
    392
  ],
  [
    "Green",
    35
  ],
  [
    "Red",
    1
  ],
  [
    "Amber",
    78
  ]
]
}

```

#### S9.4 Download drug data API

Will return all the data for a drug present in CoviRx database in JSON format.

- s. Endpoint: `drug/<drug_id>?download-json=True`
- t. Method: GET
- u. Response contains: all the identifiers, drug-likeness, original indication, assays, PK / PD, Covid clinical trials, and red flags data along with the references for the data.
- v. Example request:

```
curl "https://www.covirx.org/drug/5e03cd3b-efb1-5732-9e7e-f6aec090d005?download-json=True"
```

- w. Example response:

```

{
  "name": "Abiraterone acetate",
  "chembl": "CHEMBL271227",
  "smiles":

```

```

"CC(=O)O[C@H]1CC[C@@]2(C)C(=CC[C@H]3[C@@H]4CC=C(c5ccnc5)[C@@]4(C)CC[C@@H]32)C1",
  "inchi": null,
  "drug_likeness": {
    "Molecular Weight": "391.555",
    "No. of Chiral Centres": "6",
    "logP": "5.9694",
    "HBA": "3",
    "HBD": "0",
    "PSA": "39.19",
    "Rotation bonds": "2",
    "Administration route": "Oral",
    "Indication class/ category": "Antineoplastic"
  },
  "original_indication": {
    "Indication": "",
    "Indication (1)": "Antineoplastic",
    "status": "Launched",
    "Pathway": "Metabolic Enzyme/Protease",
    "Pathway (1)": "Steroid hormone biosynthesis",
    "Target": "Cytochrome P450",
    "Target (1)": "CYP11B1, CYP17A1",
    "moa": "",
    "MOA(1)": "androgen biosynthesis inhibitor",
    "source": ""
  },
  "Biological Description": "Abiraterone acetate (CB7630) is an oral, potent, selective, and irreversible inhibitor of CYP17A1 with antiandrogen activity. Abiraterone acetate is a prodrug form of Abiraterone (CB7598).\nIC50 & Target: CYP17A1[2]\nIn Vitro: Abiraterone (Abi) acetate is an ester prodrug of the anticancer agent Abiraterone, which shows IC50 values of 15 nM and 2.5 nM for the 17,20-lyase and 17\u03b21-hydroxylase (CYP17 is a bifunctional enzyme with both 17\u03b21-hydroxylase and 17,20-lyase activity). Abiraterone inhibits human 17,20-lyase and 17\u03b21-hydroxylase with IC50 of 27 and 30 nM respectively[1]. \nSignificant inhibition of proliferation of the AR-positive prostate cancer cell lines LNCaP and VCaP with doses of Abiraterone \u2265 2655 \u03bcM is confirmed[2]. Abiraterone inhibits recombinant human 3\u03b22HSD1 and 3\u03b22HSD2 activity with competitive Ki values of 2.1 and 8.8 \u03bcM. 10 \u03bcM Abiraterone is sufficient to completely block synthesis of 5\u03b21-dione and DHT in both cell lines. Treatment with Abiraterone significantly inhibited CRPC progression in the robustly growing subset, effectively putting a ceiling on tumor growth over 4 weeks of treatment (P[3]).\nIn Vivo: Abiraterone (Abi) acetate prolongs survival in castration-resistant prostate cancer (CRPC). [3H]-dehydroepiandrosterone (DHEA) depletion and \u03944-androstenedione (AD) accumulation are inhibited by Abiraterone in LNCaP, with an IC50[3].",
  "Research Area": "Cancer"
},

```

```

"identifiers": {
  "CAS Number": "154229-18-2",
  "Formula": "C26H33NO2",
  "Synonyms": "CB7630",
  "ChEBL": null,
  "PubChem ID":
"139597119|87055577|87055578|9821849|152986093|144748333|75201460|11670322|86582960|1448
78649|71696658",
  "ChemBank": null,
  "Drug Bank": null
},
"activity_rank": "0.08687820135",
"target_models": {
  "Caco2 Ellinger": {
    "% inhibition": "47.15",
    "IC50 (nM)": "",
    "CC50 (nM)": "",
    "Caco2 Selectivity index": ""
  },
  "3CLPro Kuzikov": {
    "% inihibition": "18.05",
    "IC50 (nM)": ""
  },
  "SARS-CoV Pseudotyped particle entry Vero E6 - NCATS and PubChem (AID:1479145)": {
    "AC50 (\u03bcM)": "0",
    "AUC": "-1.884845252",
    "Potency (\u03bcM)\nConcentration at which compound exhibits half-maximal efficacy,
AC50. Extrapolated AC50s also include the highest efficacy observed and the concentration of
compound at which it was observed.": "0",
    "Efficacy (%) \nMaximal efficacy of compound, reported as a percentage of control. These
values are estimated based on fits of the Hill equation to the dose-response curves. ": "0",
    "Activity": "Inactive"
  },
  "SARS-CoV Pseudotyped particle entry Vero E6 (Tox counterscreen)- NCATS and PubChem
(AID:1479150)": {
    "AC50 (\u03bcM)": "0",
    "AUC": "16.64367159",
    "Potency (\u03bcM) \nConcentration at which compound exhibits half-maximal efficacy, AC50.
Extrapolated AC50s also include the highest efficacy observed and the concentration of compound at
which it was observed.": "0",
    "Efficacy (%) \nMaximal efficacy of compound, reported as a percentage of control. These
values are estimated based on fits of the Hill equation to the dose-response curves. ": "0",
    "Activity": "Inactive",

```

```

    "Tox": "Inactive"
  },
  "MERS Pseudotyped particle entry Huh7 - NCATS and PubChem (AID:1479149)": {
    "AC50 (\u03bcM)": "0",
    "AUC": "1.634591441",
    "Potency (\u03bcM) Concentration at which compound exhibits half-maximal efficacy, AC50. Extrapolated AC50s also include the highest efficacy observed and the concentration of compound at which it was observed.": "0",
    "Efficacy (%) Maximal efficacy of compound, reported as a percentage of control. These values are estimated based on fits of the Hill equation to the dose-response curves. ": "0",
    "Activity": "Inactive"
  },
  "MERS Pseudotyped particle entry Huh7 (Tox counterscreen) - NCATS and PubChem (AID:1479147)": {
    "AC50 (\u03bcM)": "0",
    "AUC": "0",
    "Potency (\u03bcM) Concentration at which compound exhibits half-maximal efficacy, AC50. Extrapolated AC50s also include the highest efficacy observed and the concentration of compound at which it was observed.": "0",
    "Efficacy (%) Maximal efficacy of compound, reported as a percentage of control. These values are estimated based on fits of the Hill equation to the dose-response curves. ": "0",
    "Activity": "Inactive",
    "Tox": "Inactive"
  },
  "SARS-CoV-2 cytopathic effect (CPE) - NCATS, PubChem (AID:1508606) and Chen": {
    "AC50 (\u03bcM)": "0",
    "AUC": "10.94748344",
    "Potency (\u03bcM) Concentration at which compound exhibits half-maximal efficacy, AC50. Extrapolated AC50s also include the highest efficacy observed and the concentration of compound at which it was observed.": "",
    "Efficacy (%) Maximal efficacy of compound, reported as a percentage of control. These values are estimated based on fits of the Hill equation to the dose-response curves. ": "",
    "Activity": "",
    "CPE EC50 (\u03bcM)": "",
    "CPE % Efficacy": ""
  },
  "SARS-CoV-2 cytopathic effect (CPE)(Tox counterscreen) - NCATS, PubChem (AID:1508605) and Chen": {
    "AC50 (\u03bcM)": "4.466835922",
    "AUC": "-55.95373116",
    "Potency (\u03bcM) Concentration at which compound exhibits half-maximal efficacy, AC50. Extrapolated AC50s also include the highest efficacy observed and the concentration of compound at which it was observed.": ""
  }
}

```

```
"Efficacy (%)" Maximal efficacy of compound, reported as a percentage of control. These values are estimated based on fits of the Hill equation to the dose-response curves. ": "",
"Activity": "",
"Tox": "",
"Cytotox CC50 (uM)": "",
"% Cytotox": ""
},
},
"covid_trials": {
"Covid trials": "No",
"Phase": "",
"Application (Treatment/Management)": "",
"Outcome": "",
"References": ""
},
"pk_pd": {
"Administration route": "Oral",
"Absorption": "",
"Cmax": "",
"Notes on absorption": "",
"protein-binding": ">99%",
"BDDCS (Biopharmaceutical Drug Disposition Classification System)": "",
"S (Water solubility)": "",
"EoM (Fraction excreted unchanged in urine)": "",
"MRTD (Maximum Recommended Therapeutic Daily Dose)": "",
"Vd (Volume of distribution)": "",
"CL (Clearance)": "",
"fu (Fraction unbound in plasma)": "",
"t_half (Half-life)": "5-14h",
"BA (Bioavailability)": "",
"Ccalc (uM)": ""
},
"red_flags": {
"Drug interactions": "Ombitasvir/paritaprevir/ritonavir & dasabuvir",
"Contraindications": "Cardiovascular diseases",
"Pregnancy concerns": "Category D",
"Breast feeding ": "Not recommended",
"Notes (Breast feeding)": "ZYTIGA is not for use in women. It is unknown if either abiraterone or its metabolites are excreted in human breast milk. (TGA)",
"Side effects": "None",
"Predicted CAD (Cationic amphiphile) induced phospholipidosis": ""
},
"filters_passed": 4,
```

"references": "[1] Stein MN, et al. Androgen synthesis inhibitors in the treatment of castration-resistant prostate cancer. *Asian J Androl*. 2014 May-Jun;16(3):387-400. [2] Richards J, et al. Interactions of abiraterone, eplerenone, and prednisolone with wild-type and mutant androgen receptor: a rationale for increasing abiraterone exposure or combining with MDV3100. *Cancer Res*. 2012 May 1;72(9):2176-82. [3] Li R, et al. Abiraterone inhibits 3 $\beta$ -hydroxysteroid dehydrogenase: a rationale for increasing drug exposure in castration-resistant prostate cancer. *Clin Cancer Res*. 2012 Jul 1;18(13):3571-9. [4] Lee GT, et al. Intracrine androgen biosynthesis in renal cell carcinoma. *Br J Cancer*. 2017 Mar 28;116(7):937-943. [5] A O'Donnell, et al. Hormonal impact of the 17 $\beta$ -hydroxylase/C17,20-lyase inhibitor abiraterone acetate (CB7630) in patients with prostate cancer. *British Journal of Cancer* volume 90, pages2317-2325 (2004) "

}

## S10. Additional information regarding reusability of CoviRx web app

- The CoviRx platform was designed to be highly customizable, and thus, most components are reusable and not hard-coded. CoviRx was built as a SarCov2 drug repurposing database; however, it can be extended to other diseases in the future by using functionalities such as custom fields.
- Every data field of a drug displayed on the CoviRx platform maps to an attribute in the database. This implies that the code needs to be altered if a field is added, deleted, or modified for a particular drug. To overcome this problem of changing the code repeatedly, custom fields were introduced. Custom Fields feature is one of the critical components in the admin panel. It is a **JSON field** in the database that stores key-value pairs with the key holding the name of the drug field and the value holding the value for that field. This feature would make CoviRx extensible and flexible in the long run.
- Other functionalities which can be customized are located in the **CoviRx/main/utils.py** file in the repository. Some variables that can be used to customize CoviRx include the Search fields to customize the identifiers used in the search engine, Target model names to change the assay data to be stored in the database, verbose names, extra references, etc.
- To extend the CoviRx database to import datasets for other diseases, the `csv_upload.py` file needs to be edited, and the data would be stored for the new fields in the database. The use of custom fields ensures that no other changes are needed in tables.
- For changing the frontend of the website, the `individual_drug.html` file needs to be changed, and the necessary data be supplied by changing the `views.py` file.
- Django template language, modular structure, minimum dependencies, and other design principles ensure that extending CoviRx remains simple.

## S11. References

- 1) Django (Version 3.2). Available online: <https://www.djangoproject.com/> (accessed on Jan 26, 2022).
- 2) Using OAuth 2.0 to Access Google APIs. Available online: <https://developers.google.com/identity/protocols/oauth2> (accessed on Jan 26, 2022).
- 3) RDKit. Available online: <https://www.rdkit.org/> (accessed on Jan 26, 2022).
- 4) "django-flat-json-widget", *PyPI*, 2022. Available online: <https://pypi.org/project/django-flat-json-widget/> (accessed: 06- Feb- 2022)
- 5) "django-admin-interface", *PyPI*, 2022. Available online: <https://pypi.org/project/django-admin-interface/> (accessed: 06- Feb- 2022).
- 6) GitHub - peterbe/premailer: Turns CSS blocks into style attributes Available online: <https://github.com/peterbe/premailer> (accessed on Jan 26, 2022).
- 7) "celery", *PyPI*, 2022. . Available online: <https://pypi.org/project/celery/> , (accessed: 06- Feb- 2022).
- 8) Charts | Google Developers", *Google Developers*, 2022. Available online: <https://developers.google.com/chart> (accessed: 06- Feb- 2022).

- 9) Cloud Translation documentation | Google Cloud Available online: <https://cloud.google.com/translate/docs> (accessed on Jan 26, 2022).
- 10) reCAPTCHA. Available online: <https://www.google.com/recaptcha/about/> (accessed on Jan 26, 2022).
- 11) "IMAP, POP, and SMTP | Gmail IMAP | Google Developers", *Google Developers*, 2022. Available online: <https://developers.google.com/gmail/imap/imap-smtp> (accessed: 06- Feb- 2022).
- 12) Tanimoto, T.T. Elementary mathematical theory of classification and prediction. **1958**.
- 13) Bajusz, D.; Rácz, A.; Héberger, K. Why is Tanimoto index an appropriate choice for fingerprint-based similarity calculations? *Journal of Cheminformatics* **2015**, 7, 1–13. 10.1186/S13321-015-0069-3/FIGURES/7.
