# Supplementary material
Source: MDPI journal article supplement (https://www.mdpi.com/2306-5729/7/11/164)
Supplement: s1 [file s1 › Total list of 214 drugs-table.pdf]

| Analgesic (7)          |             | Anesthetic (1)      |             | Antiallergic (6)      |             | Anti-Alzheimer's (2) |             | Antiasthmatic (3)   |             | Antidysuria (2)           |             | Skeletal muscle relaxant (5)                                       |             |
|------------------------|-------------|---------------------|-------------|-----------------------|-------------|----------------------|-------------|---------------------|-------------|---------------------------|-------------|--------------------------------------------------------------------|-------------|
| Eugenol                | 0.339079005 | Benoxinate          | 0.440320963 | Acrivastine           | 0.294793256 | Gаланthamine         | 0.509711179 | Zileuton            | 0.502343767 | Silodosin                 | 0.422137504 | Procyclidine                                                       | 0.200601805 |
| Guaiacol               | 0.409876543 | Antihelmintic (5)   |             | Antazoline            | 0.389167503 | Donepezil            | 0.621708212 | Revefenacin         | 0.55014236  | Tamsulosin                | 0.629834854 | Metaxalone                                                         | 0.479650679 |
| Etoricoxib             | 0.441690455 | Mebendazole         | 0.293254424 | Cromolyn              | 0.586412799 | Anti-anemic (1)      |             | Cromolyn            | 0.586412799 | Anti-HIV (4)              |             | Orphenadrine                                                       | 0.488294843 |
| Capsaicin              | 0.598152436 | Hexylresorcinol     | 0.334380769 | Fexofenadine          | 0.592778335 | Voxelotor            | 0.508575019 | Anticoagulant (1)   |             | Rilpivirine               | 0.239437002 | Chlorzoxazone                                                      | 0.624856897 |
| Camphor                | 0.642144911 | Triclabendazole     | 0.382753711 | Clemastine            | 0.676563661 | Antiarrhythmic (2)   |             | Treprostinil        | 0.369186966 | Indinavir                 | 0.307407407 | Methocarbamol                                                      | 0.721742728 |
| Parecoxib              | 0.673656549 | Praziquantel        | 0.433950617 | Epinastine            | 0.814503848 | Carteolol            | 0.359077232 | Antidiarrheal (1)   |             | Elvitegravir              | 0.335371095 | Vasoconstrictor (10)                                               |             |
| Nefopam                | 0.781215860 | Pyrantel            | 0.495061728 |                       |             | Esmolol              | 0.652858376 | Telotristat         | 0.406824053 | Delavirdine               | 0.497687905 | Oxymetazoline                                                      | 0.307797721 |
| Antibacterial (22)     |             | Anticonvulsant (4)  |             | Antiemetic (8)        |             | Antiglaucoma (3)     |             | Antimalarial (1)    |             | Antiparasitic (2)         |             | Zolmitriptan                                                       | 0.326485837 |
| L-cycloserine          | 0.009876543 | Tiagabine           | 0.364215659 | Mecizline             | 0.111515343 | Carteolol            | 0.359077232 | Pyrimethamine       | 0.098968528 | Moxidectin                | 0.064192578 | Rizatriptan                                                        | 0.448211086 |
| Cefaclor               | 0.186339336 | Stiripentol         | 0.491190721 | Palonosetron          | 0.231317547 | Methazolamide        | 0.423712824 | Antimigrane (7)     |             | Fexinidazole              | 0.328202636 | Sumatriptan                                                        | 0.4741407   |
| Gramicidin             | 0.246840933 | Rufinamide          | 0.573817697 | Trimethobenzamide     | 0.243731194 | Acetazolamide        | 0.747863734 | Rimegepant          | 0.300714773 | Antiparkinsonian (8)      |             | Eletriptan                                                         | 0.501849689 |
| Tedizolid              | 0.350097476 | Levetiracetam       | 0.622889148 | Cinnarizine           | 0.34299257  | Anti-gout (2)        |             | Zolmitriptan        | 0.326485837 | Procyclidine              | 0.200601805 | Tetrahydrozoline                                                   | 0.535234222 |
| Cycloserine (D)        | 0.354572321 | Antidepressant (4)  |             | Dimenhydrinate        | 0.421580047 | Probenecid           | 0.477773903 | Rizatriptan         | 0.448211086 | Cabergoline               | 0.294052515 | Naphazoline                                                        | 0.546794686 |
| Ethambutol             | 0.385043277 | Mianserin           | 0.192577733 | Domperidone           | 0.472926802 | Allopurinol          | 0.669053219 | Sumatriptan         | 0.4741407   | Pergolide                 | 0.479682924 | Naratriptan                                                        | 0.581493984 |
| Fusidic acid           | 0.413748275 | Dapoxetine          | 0.235887511 | Ondansetron           | 0.521440627 | Anti-obesity (5)     |             | Eletriptan          | 0.501849689 | Safinamide                | 0.488432346 | Phenylephrine                                                      | 0.692372688 |
| Pyrazinamide           | 0.438644828 | Agomelatine         | 0.387880347 | Cyclizine             | 0.558292684 |                      |             | Naratriptan         | 0.581493984 | Istradefylline            | 0.511896028 | Xylometazoline                                                     | 0.74137931  |
| Furazolidone           | 0.439866992 | Moclobemide         | 0.477536928 | Antifungal (8)        |             | Probucol             | 0.344596944 | Almotriptan         | 0.848545637 | (s)-Rasagiline            | 0.55014236  | Vasodilator (7)                                                    |             |
| Sulfamethizole         | 0.49834534  | Antidiabetic (10)   |             | Natamycin             | 0.513639795 | Orlistat             | 0.347638621 | Antineoplastic (9)  |             | Ropinirole                | 0.592184005 | Betahistine                                                        | 0.297893681 |
| Cefuroxime             | 0.510746496 | Chlorpropamide      | 0.417502713 | Benzoic acid          | 0.523450029 | ETC-1002             | 0.586258585 | Gefitinib           | 0.231478324 | Bromocriptine             | 0.920987654 | Ranolazine                                                         | 0.310760677 |
| Natamycin              | 0.513639795 | Repaglinide         | 0.512423171 | Bifonazole            | 0.580508783 | Gemfibrozil          | 0.63406326  | Rucaparib           | 0.275922578 | Antiviral (6)             |             | Treprostinil                                                       | 0.369186966 |
| Methenamine            | 0.521922736 | Alogliptin          | 0.531589514 | Butenafine            | 0.582492397 | Clofibrate           | 0.768020729 | Capmatinib          | 0.341402323 | Dasabuvir                 | 0.420643818 | Phentolamine                                                       | 0.552994479 |
| Pretomanid             | 0.526583627 | Tolbutamide         | 0.541669615 | Sertaconazole         | 0.630477454 | Antihypertensive (9) |             | Umbralisib          | 0.418878454 | Acyclovir                 | 0.482951656 | Isosorbide                                                         | 0.586194534 |
| Nitrofurantoin         | 0.56574099  | Tolazamide          | 0.594399805 | Terbinafine           | 0.677445555 | Moxonidine           | 0.302354953 | Tepotinib           | 0.461538462 | Rimantadine               | 0.545401865 | Selexipag                                                          | 0.741876559 |
| Aztreonam              | 0.569777245 | Diazoxide           | 0.597038633 | Voriconazole          | 0.688060994 | Carteolol            | 0.359077232 | Erlotinib           | 0.553456518 | Paritaprevir              | 0.639980972 | Papaverine                                                         | 0.895561725 |
| Ethionamide            | 0.602006149 | Glyburide           | 0.609251015 | Miconazole            | 0.938874595 | Treprostinil         | 0.369186966 | Relugolix           | 0.636349257 | Valacyclovir              | 0.657083526 | Anti-ulcerative (4)                                                |             |
| Enoxacin               | 0.602384702 | Gliclazide          | 0.661238035 | Anti-inflammatory (5) |             | Mecamylamine         | 0.400360842 | Bosutinib           | 0.712120137 | Famciclovir               | 0.71838367  | Mepenzolate                                                        | 0.284854564 |
| Nalidixic acid         | 0.626888015 | Saxagliptin         | 0.690423959 | Deflazacort           | 0.153934024 | Guanethidine         | 0.572718154 | Venetoclax          | 0.778748695 | Anti-vertigo (3)          |             | Nizatidine                                                         | 0.620981227 |
| Cefuroxime axetil      | 0.639845058 | Glipizide           | 0.70903398  | Allantoin             | 0.547131208 | Lofexidine           | 0.603548917 | Antitussive (3)     |             | Betahistine               | 0.297893681 | Clidinium                                                          | 0.725713204 |
| Sulfacetamide          | 0.646885651 | Antidote (2)        |             | Mesalamine            | 0.550784626 | Mannitol             | 0.704254103 | Guaifenesin         | 0.444879082 | Cinnarizine               | 0.34299257  | Cimetidine                                                         | 0.819181253 |
| Sulfadiazine           | 0.798219828 | Tiopronin           | 0.469954311 | Flunisolide           | 0.600594726 | Selexipag            | 0.741876559 | Benzonate           | 0.679037111 | Dimenhydrinate            | 0.421580047 | Multiple sclerosis agent (1)                                       |             |
| Sulfadiazine           | 0.798219828 | Uridine             | 0.787512162 | Camphor               | 0.642144911 | Osilodrostat         | 0.782505536 | Dextromethorphan    | 0.681043129 |                           |             | Fampridine                                                         | 0.682491459 |
| Antihyperammonemic (1) |             | Antiresorptive (1)  |             | Antispasmodic (7)     |             | Anxiolytic (2)       |             | Diuretic (2)        |             | Laxative (2)              |             | Miotic (1)                                                         |             |
| Carglumic acid         | 0.515083448 | Alendronate         | 0.900664347 | Tolterodine           | 0.027160494 | Buspirone            | 0.472417252 | Urea                | 0.553363461 | Naloxegol                 | 0.557327167 |                                                                    |             |
| Antihypercalcemia (1)  |             | Antithyroid (1)     |             | Mepenzolate           | 0.284854564 | Hydroxyzine          | 0.789952456 | Mannitol            | 0.704254103 | Sodium picosulfate        | 0.653619566 | Pilocarpine                                                        | 0.585255767 |
| Cinacalcet             | 0.979785291 | Antityrosinemia (1) |             | Dicyclomine           | 0.397191575 | Bronchodilator (1)   |             | Hypnotic (2)        |             | Midriatic (1)             |             | Drugs and their activity scores are classified based on categories |             |
|                        |             |                     |             | Mebeverine            | 0.442828485 | Metaproterenol       | 0.702132871 | Tasimelteon         | 0.494479606 | Phenylephrine             | 0.692372688 |                                                                    |             |
|                        |             |                     |             | Darifenacin           | 0.529922376 | CFTR modulator (2)   |             | Lemborexant         | 0.565073764 | Neuromuscular blocker (2) |             |                                                                    |             |
|                        |             |                     |             | Propantheline         | 0.545379892 | Lumacaftor           | 0.481666444 | Immunostimulant (1) |             | Belumosudil               | 0.518721935 |                                                                    |             |
|                        |             |                     |             | Papaverine            | 0.895561725 | Tezacaftor           | 0.55562657  | Inosine             | 0.922222222 | Amifampridine             | 0.549619745 |                                                                    |             |
